# Supplementary figures and images for: Single-cell analysis reveals dynamics of human B cell differentiation and identifies novel B and antibody-secreting cell intermediates
Source: eLife journal article supplement (doi:10.7554/elife.83578), 2023-03-02

Figure 2—figure supplement 2

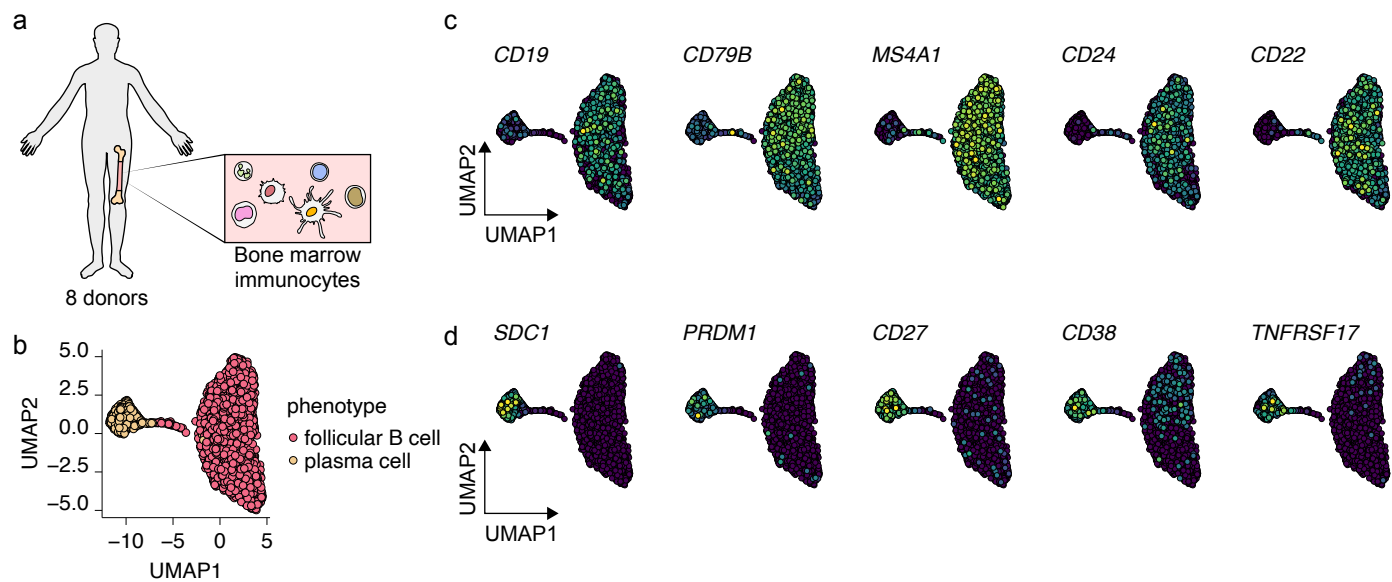

Supplement: supp [file elife-83578-supp-v1.zip]

# Figure3-figure supplement 1

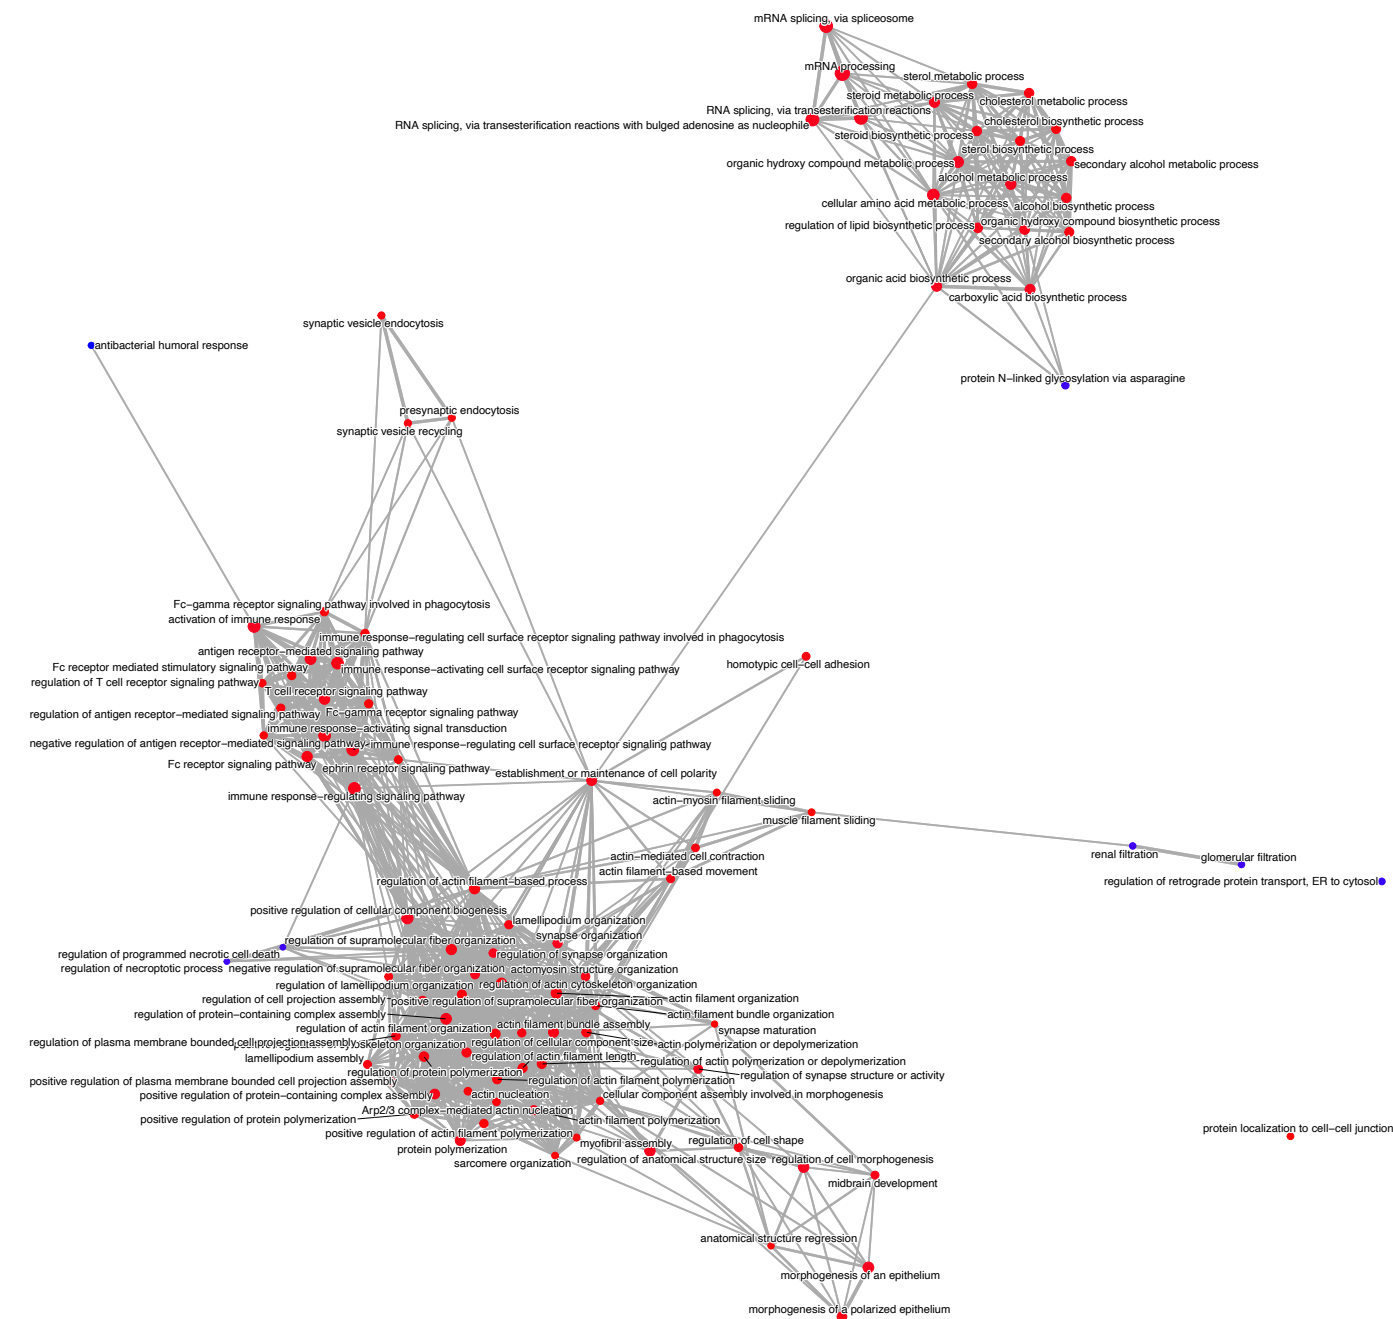

Supplement: supp [file elife-83578-supp-v1.zip]

Figure 2—figure supplement 4

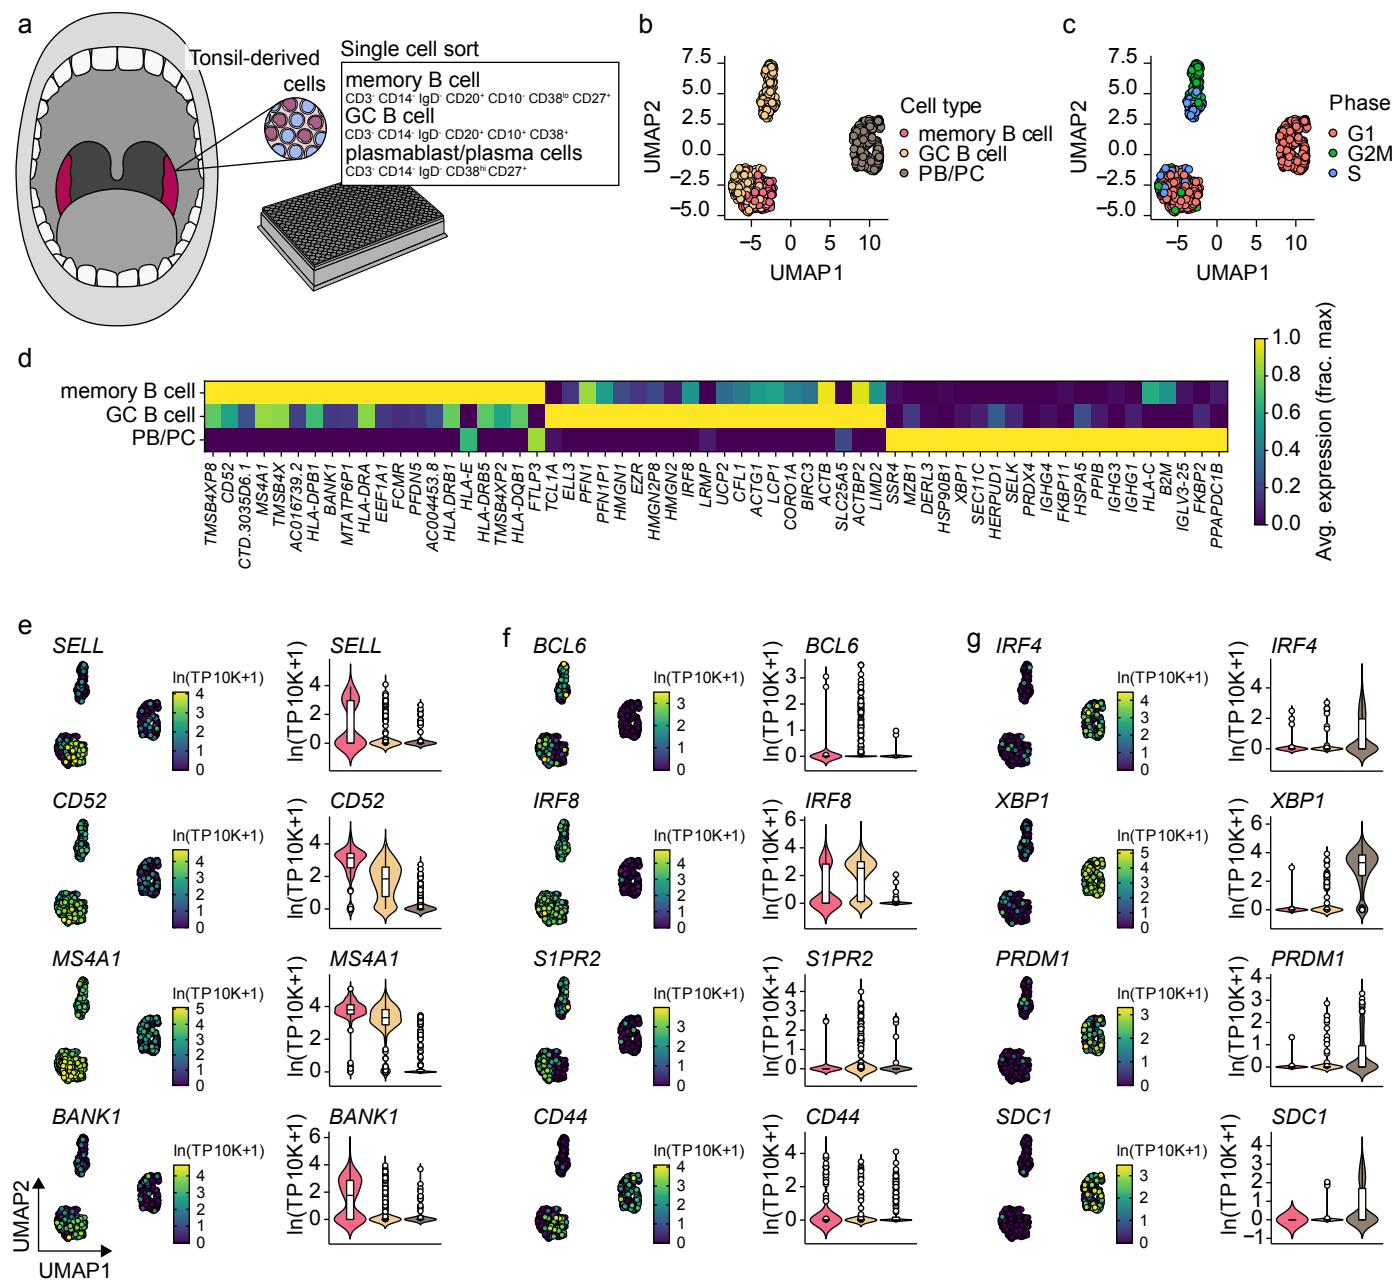

Supplement: supp [file elife-83578-supp-v1.zip]

Figure 2—figure supplement 1

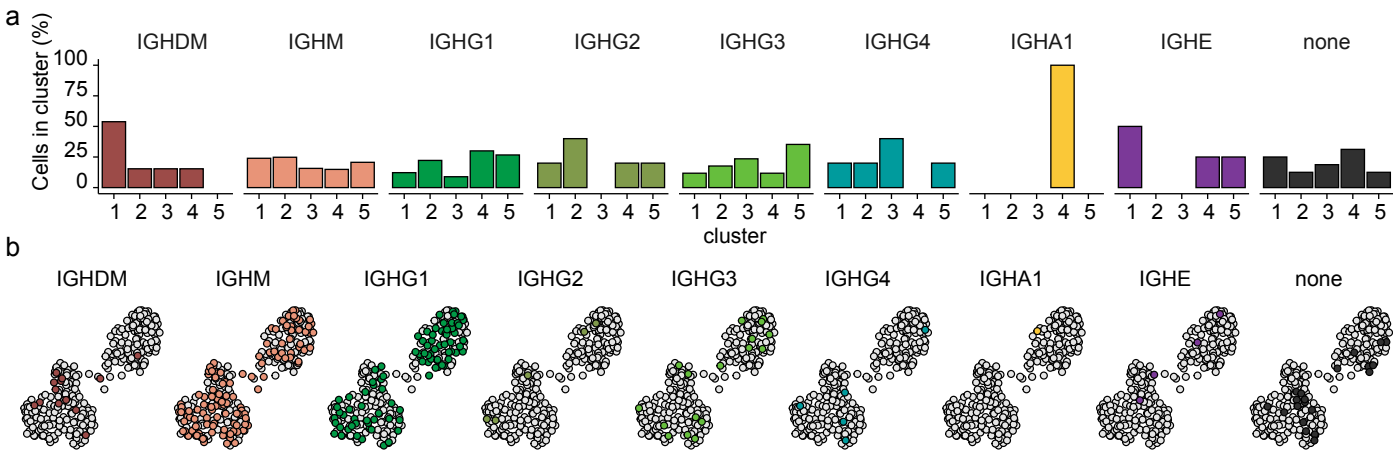

Supplement: supp [file elife-83578-supp-v1.zip]

# Figure 1—figure supplement 1

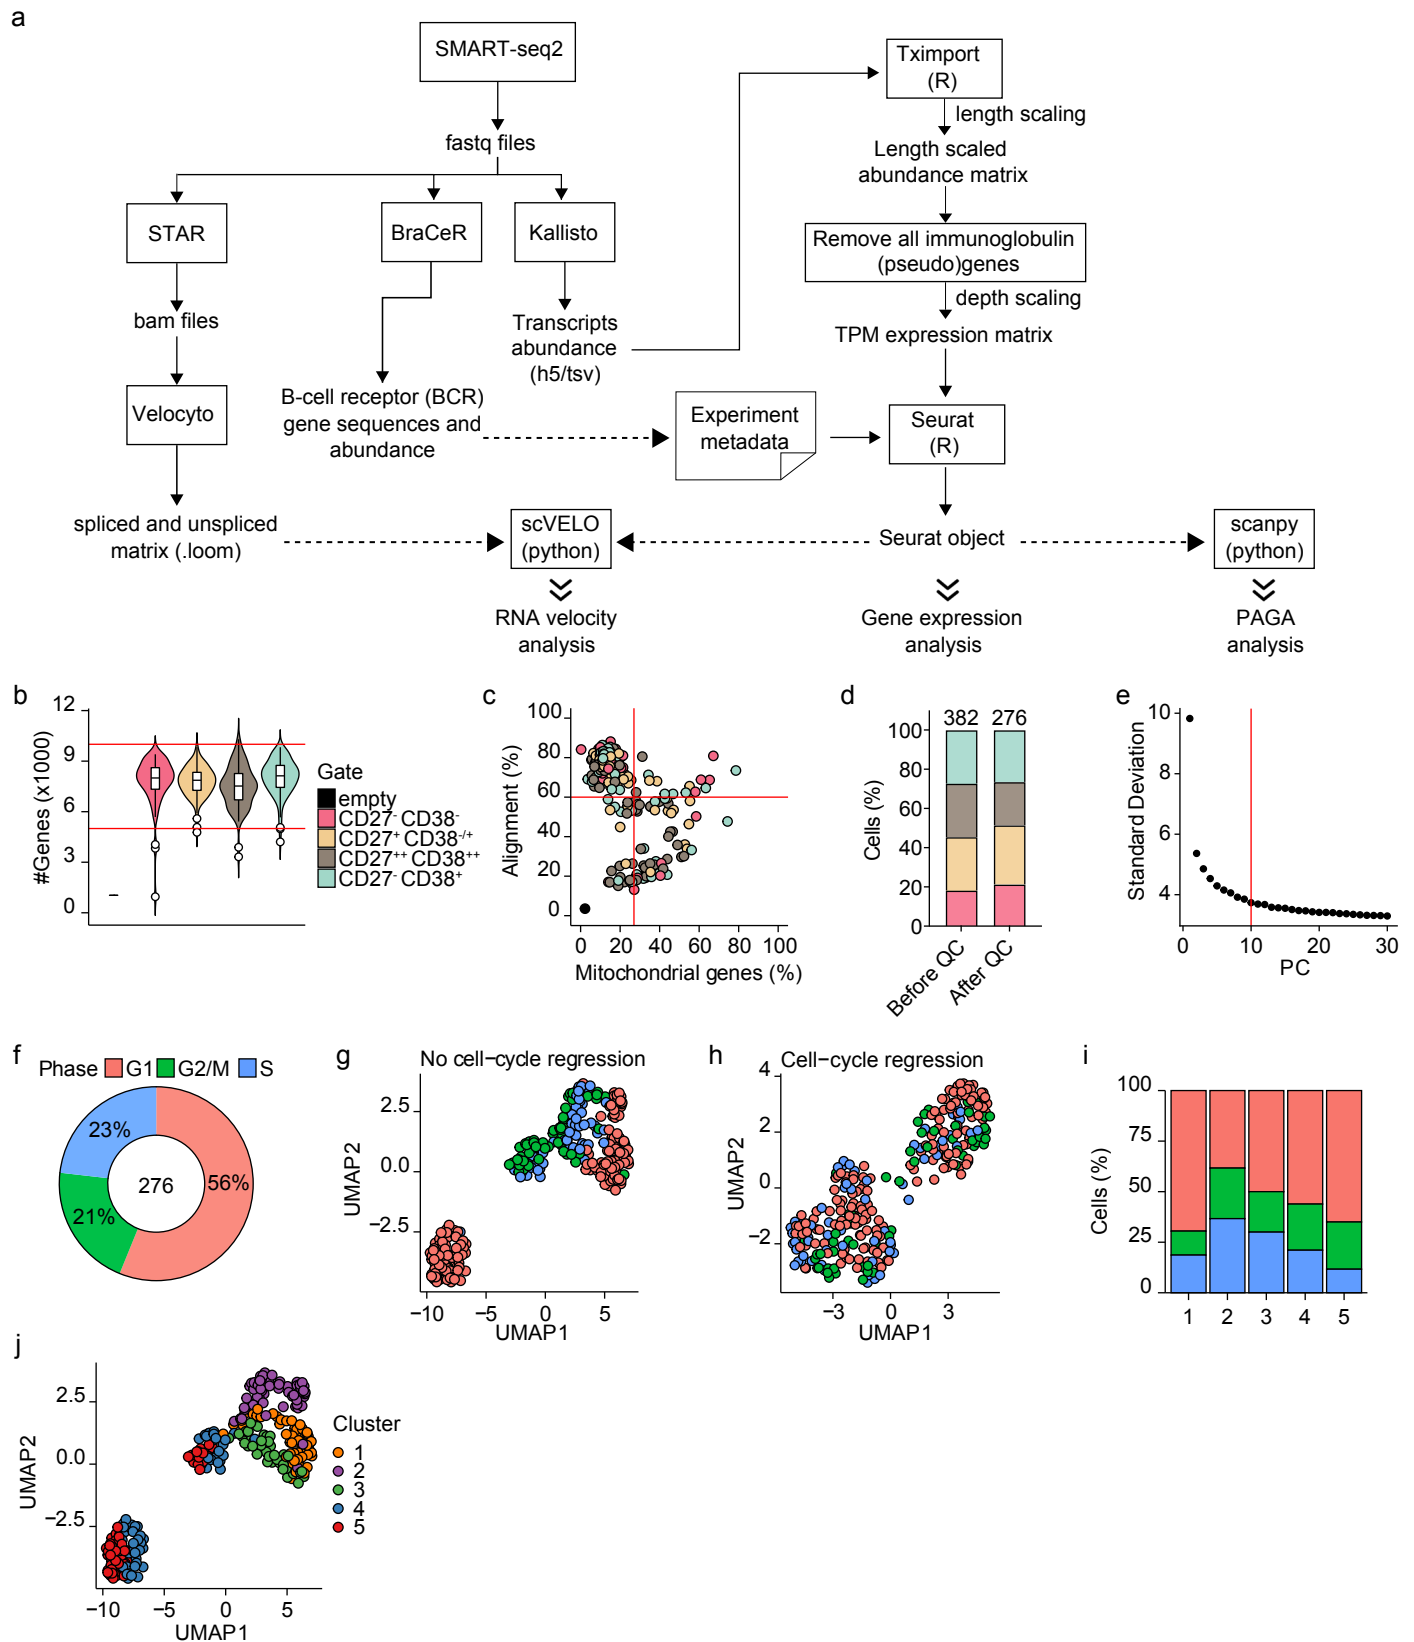

Supplement: supp [file elife-83578-supp-v1.zip]

Figure 2—figure supplement 3

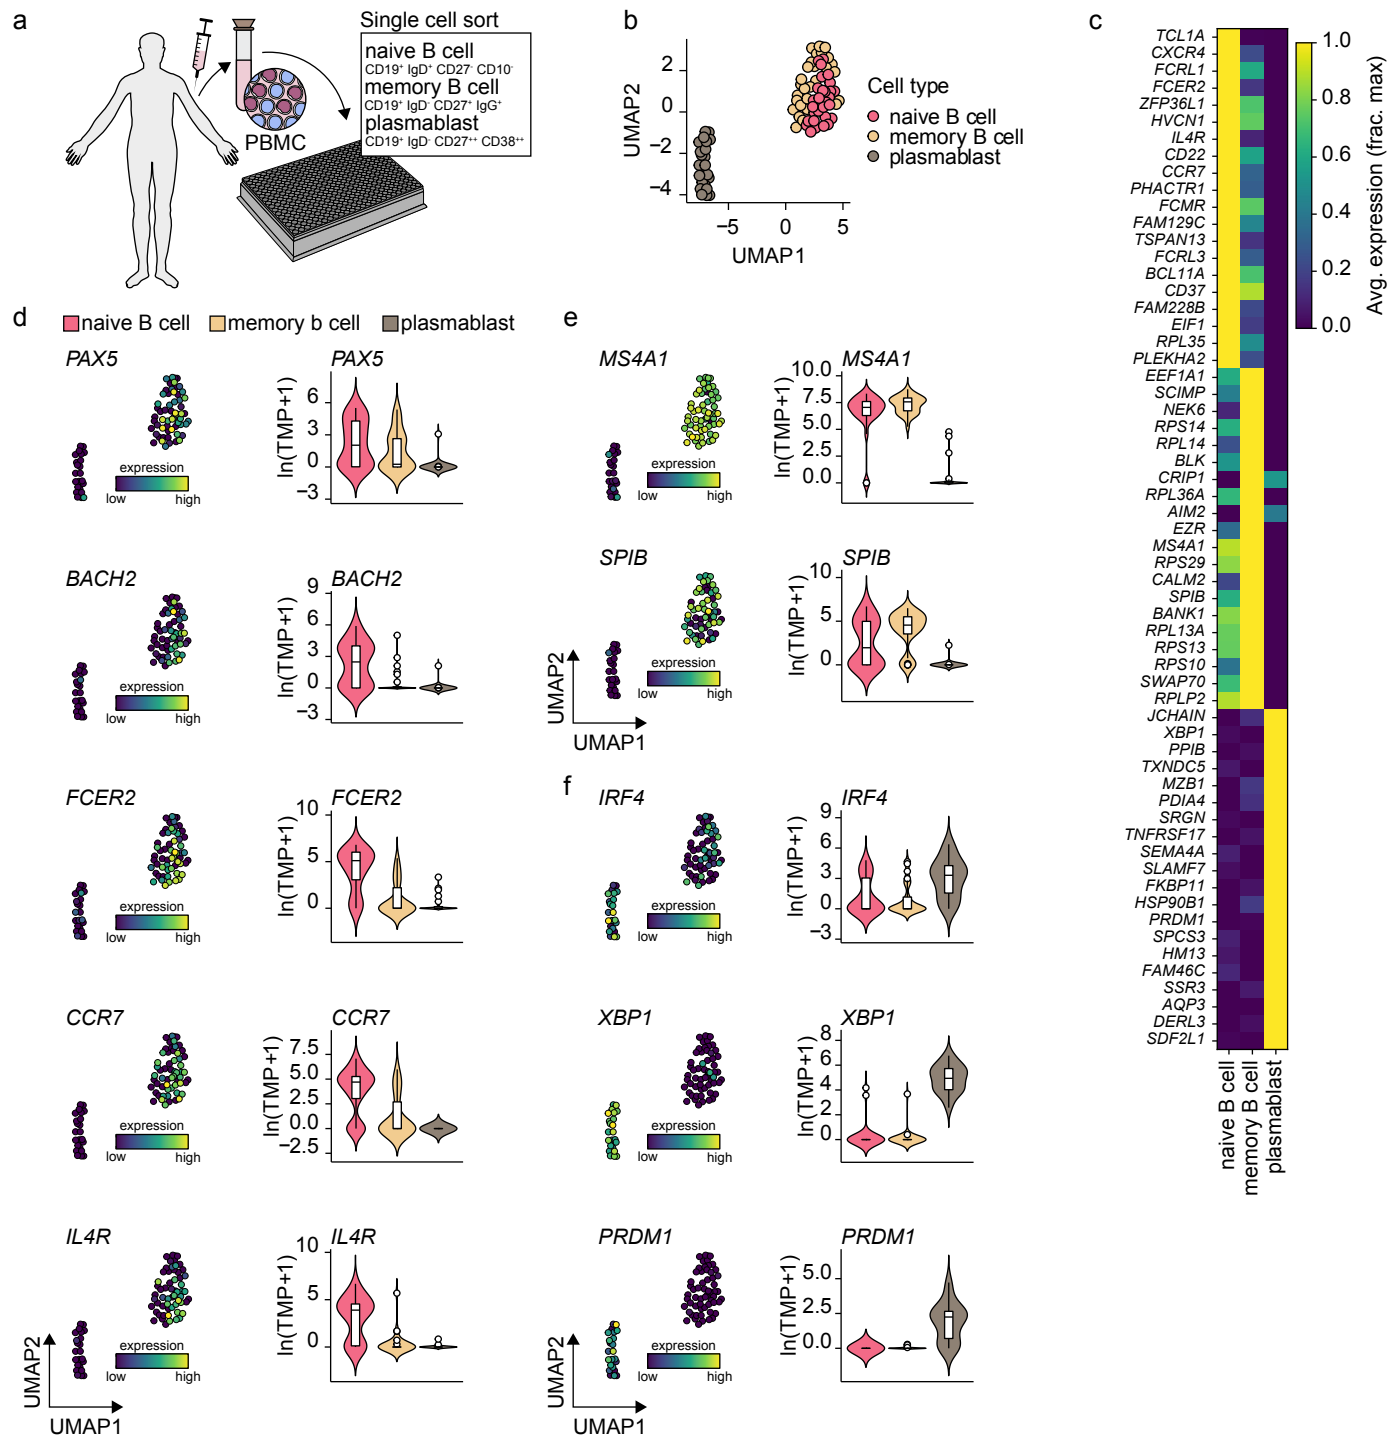

Supplement: supp [file elife-83578-supp-v1.zip]

Figure 1—figure supplement 2

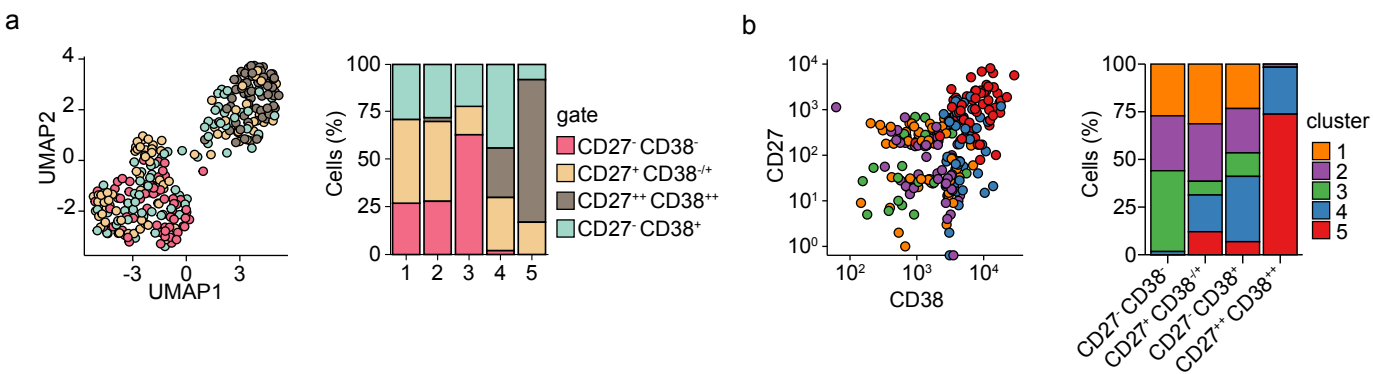

Supplement: supp [file elife-83578-supp-v1.zip]
